# 1 Title

2 Telemedicine and clinical care for Neglected Tropical Diseases in a post-pandemic  
3 world: where are we on the way to mitigate global inequities? A scoping review

## 4 Short title

5 Telemedicine for Tropical Neglected Diseases in a post-pandemic world

## 6 Author list

7 Fernanda G F Salvador\* (1, 2) #a, Claudia D Jardim (2) #b, Mayumi D Wakimoto (3),  
8 Luis V Lapão (1), Henrique M C da Silveira (1), Cláudia M Valete (2, 4) #c

9 (1) Center for R&D in Global Health and Tropical Medicine (GHTM), Institute of  
10 Hygiene and Tropical Medicine (IHMT), Universidade Nova de Lisboa (UNL),  
11 Lisbon, Portugal

12 (2) Laboratory of Clinical Research and Surveillance in Leishmaniasis, Evandro  
13 Chagas National Institute of Infectious Diseases (INI), Oswaldo Cruz Foundation  
14 (FIOCRUZ), Rio de Janeiro, Brazil

15 (3) Health Surveillance Service (SEVS), Evandro Chagas National Institute of  
16 Infectious Diseases (INI), Oswaldo Cruz Foundation (FIOCRUZ), Rio de Janeiro,  
17 Brazil

18 (4) Department of Otorhinolaryngology and Ophthalmology, School of Medicine,  
19 Federal University of Rio de Janeiro (UFRJ), Rio de Janeiro, Brazil

20 #a Current Address: Institute of Hygiene and Tropical Medicine (IHMT), Universidade  
21 Nova de Lisboa (UNL), Rua da Junqueira 100, 1349-008, Lisbon, Portugal

**NOTE: This preprint reports new research that has not been certified by peer review and should not be used to guide clinical practice.**

22 #b Current Address: Evandro Chagas National Institute of Infectious Diseases (INI),  
23 Oswaldo Cruz Foundation (FIOCRUZ), Av. Brasil 4365, 21040-360, Rio de Janeiro,  
24 Brazil,

25 #c Current Address: Faculdade de Medicina, Universidade Federal do Rio de Janeiro  
26 (UFRJ), Rua Prof. Rodolpho Paulo Rocco 255, 21941-617, Rio de Janeiro, Brasil

27 \* **Corresponding author**

28 Email: [afernandasalvador@gmail.com](mailto:afernandasalvador@gmail.com)

## 29 **Abstract**

30 **Background** Neglected Tropical Diseases (NTDs) represent a global public health  
31 problem with great socioeconomic impact. Using digital health technologies to provide  
32 medical care remotely can be an important strategy for reducing inequalities in access but  
33 is challenging in low-and middle-income settings and geographically isolated areas. The  
34 objective of the current review was to identify and summarize international evidence on  
35 the use of telemedicine for clinical care of patients with NTD around the world based on  
36 a scoping review protocol. **Methodology/Principal Findings** A total of 422 articles were  
37 extracted from the databases MEDLINE/PubMed, Web of Science and Scopus, and after  
38 remove 129 duplicates, 285 studies were excluded because they did not meet at least one  
39 of the eligibility criteria. A total of 8 articles were included for data collection, published  
40 between 2006 and 2023, half of them after 2021 (n=4). Fifty percent of the studies (n=4)  
41 were focused on dermatological diseases, like leprosy and leishmaniosis, and the other  
42 diseases found were dengue (n=2), trachoma (n=1) and cysticercosis (n=1). Most of  
43 telemedicine interventions in NTD took place in South America (n=5), with emphasis on  
44 Brazil (n=2). Studies that evaluated the accuracy of remote diagnosis demonstrated good

45 effectiveness for leprosy, trachoma and complications of neurocysticercosis. There was a  
46 significant reduction in the need for specialized in-person medical consultations with  
47 telemedicine for the care of dengue fever and some dermatological NTDs; and an  
48 improvement in the quality of clinical monitoring of cutaneous leishmaniasis using  
49 mobile health was related. **Conclusions/Significance** This scoping review mapped the  
50 existing evidence on telemedicine applied at clinical care for NTD. Although we observed  
51 a small recent increase in academic research on the theme after COVID-19 pandemic,  
52 there is a gap in recommendations for the clinical management of NTDs through  
53 telemedicine, especially for synchronous approaches, revealing that this resource is still  
54 largely underutilized.

55 **Keywords:** Telemedicine; Telehealth; Neglected Tropical Diseases; Global Health.

## 56 **Author Summary**

57 Neglected Tropical Diseases (NTDs) represent a global public health problem with great  
58 socioeconomic impact. Using digital health technologies to provide medical care  
59 remotely can be an important strategy for reducing inequalities. The objective of this  
60 scoping review was to identify and summarize international evidence on the use of  
61 telemedicine in the clinical care of patients with NTDs. A total of 8 articles were included  
62 for data collection as they met all our search criteria, half of them published after 2021  
63 (n=4). Most of the studies took place in Latin America (n=5) and involved Primary Health  
64 Care teams (n=5). Studies that evaluated the accuracy of remote diagnosis demonstrated  
65 good effectiveness for leprosy, trachoma and complications of neurocysticercosis. There  
66 was a reduction in the need for specialized face-to-face medical consultations with  
67 telemedicine to treat dengue fever and some dermatological NTDs, and an improvement  
68 in the quality of clinical monitoring of cutaneous leishmaniasis through mobile health

69 was reported. Although we have seen a recent small increase in academic research on the  
70 topic following the COVID-19 pandemic, there is a gap in recommendations for the  
71 clinical management of NTDs through telemedicine, especially for synchronous  
72 approaches, revealing that this resource is still largely underutilized.

## 73 **Introduction**

74 Neglected Tropical Diseases (NTDs) are estimated to affect more than a billion people in  
75 poor and vulnerable regions of the world, but they occupy a disproportionate space in the  
76 priorities of the international agenda, reflected in low investments in research, therapeutic  
77 strategies and elimination/control actions [1, 2]. In addition to early mortality, disabilities  
78 caused by NTD perpetuate cycles of social exclusion due to unemployment and low  
79 education and are strongly related to socioeconomic conditions as irregular access to  
80 drinking water, basic sanitation and adequate housing. The control of these diseases is  
81 formally recognized as a goal of global action in the Sustainable Development Goals  
82 (SDGs) defined by the United Nations (UN) and the development of mechanisms to  
83 expand universal access to health is one of the main strategies recommended by the World  
84 Organization World Health Organization (WHO) to combat NTDs [1].

85 NTDs are prevalent in low- and middle-income countries (LMIC) that often have low  
86 coverage by health systems or irregular distribution of doctors between territories. Using  
87 digital health technologies to provide medical care remotely is an important strategy for  
88 reducing inequalities in access to healthcare [3, 4]. But, despite recent advances, this  
89 potential for remote assistance still appears to be scarcely explored [5]. Many NTDs are  
90 endemic in rural and remote areas and may require rapid guidance for specific clinical  
91 management (e.g. snakebite envenoming), with a great potential for the use of these  
92 strategies. In other situations, the low prevalence and/or high complexity of the pathology

93 may require highly trained focal specialists for diagnosis, and teleconsultations with  
94 distant hospital centers can optimize timely care and early treatment of NTDs, reducing  
95 the time between the onset of symptoms and specialized clinical care.

96 The Covid-19 pandemic triggered a rapid expansion in the provision of remote care via  
97 telemedicine, making it an indispensable resource for the healthcare sector [6]. The  
98 growth of successful experiences in Digital Health can be observed especially in high-  
99 income countries, but the legal regulation of this practice is heterogeneous, and its  
100 incorporation has been slower in LMIC due to low internet connection and infrastructure  
101 barriers [7]. Health systems occupy different levels of technological maturity to  
102 incorporate innovations, and many poor countries will need sustainable financial support  
103 and international technical cooperation to implement initiatives in this field.

104 Telemedicine uses telecommunications and information systems to deliver remote  
105 healthcare services when patients and providers are separated by distance [3]. Different  
106 strategies can be useful during the therapeutic journey of NTD care via telemedicine, such  
107 as synchronous telecare between professionals and patients in real time, or the exchange  
108 of opinions between experts from distant services for difficult cases. Remotely sending  
109 data, such as images and videos, can also be a simple and useful way to carry out an  
110 asynchronous teleconsultation, and the choice of the most appropriate resources will  
111 depend on the clinical situation and local context [8].

112 Although new Artificial Intelligence paradigms are rapidly advancing in healthcare and  
113 machine learning algorithms are already a reality, there is still a long way to go to ensure  
114 reliability and safety in clinical decision-making using these digital tools alone [9]. The  
115 interface with health professionals is still fundamental in health care. Despite the recent  
116 wave of research into technological innovations, the literature about successful

117 experiences of remote clinical care via telemedicine in contexts of populations affected  
118 by NTDs in the post-pandemic global scenario is unclear.

## 119 **Research questions and scope**

120 The goal of this scoping review is to review and map existing literature on telemedicine  
121 applied to NTDs. The main research question that guided the review was: what is the  
122 current state of scientific evidence on the use of telemedicine in the clinical care of  
123 patients with NTDs across the world? We seek to summarize currently available evidence  
124 of the area and identify the main gaps in knowledge production.

125 The research also sought to characterize the contexts where telemedicine initiatives for  
126 NTDs were developed, and which are the main technologies used by them.

## 127 **Methods**

128 This scoping review was conducted in accordance with the Joanna Briggs Institute (JBI)  
129 methodology for Scoping Reviews [10] and followed the methodological framework  
130 suggested by the Preferred Reporting Items for Systematic Reviews and Meta-Analyses  
131 for Scoping Review (PRISMA–ScR) [11], (S1 Table). The research protocol was  
132 registered on the Open Science Framework platform (OSF) in March 2024 and can be  
133 accessed in: <https://doi.org/10.17605/OSF.IO/XAKF5>. The team was composed of  
134 academic researchers, clinical health professionals, and digital health specialists. Three  
135 databases and interfaces were chosen for their reliability and ease of searching with  
136 extensive MeSH terms: MEDLINE/PubMed, Web of Science and Scopus.

137 For the review we considered the list of 21 NTD and disease groups currently defined and  
138 prioritized by WHO [12], with the aim of delimiting the scope of this research. However,

139 we recognize that local social determinants of health may constitute a broader range of  
140 infectious diseases of poverty in each region.

141 There are many conceptual definitions of telemedicine in literature. In this study we  
142 assume a WHO definition [8] which encompasses the following activities: 1.  
143 consultations between a remote person and a healthcare professional; 2. remote  
144 monitoring of the person's health or diagnostic data by the provider; 3. transmission of  
145 medical data (e.g. images, notes and videos) to the healthcare provider; and 4. case  
146 management consultations between healthcare providers.

147 Finally, we report that, due to the characteristics of the regions studied, the team  
148 considered all available means of communication, from videoconferences to regular calls  
149 by telephone, for example, as acceptable telemedicine resources.

## 150 **Data sources and searching strategies**

151 The keywords and their variations were defined by the working group based on literature  
152 review and sensitivity test of the terms in retrieving relevant articles. Combining these  
153 groups, we generate keywords lists for two categories (Fig. 1). An advanced search in the  
154 three selected databases were performed using Boolean operators to identify articles of  
155 interest published in the period between January 1, 2000, and February 26, 2024 (date of  
156 first retrieval).

157

## 158 **Figure 1 – Search strategy**

159

160

161

## Query strings

| Category        | Key Words                                                                                                                                                                                                                                                                                                                                                                                                                                                                                                                                                                                                                                                                                                                                                                                                                          |
|-----------------|------------------------------------------------------------------------------------------------------------------------------------------------------------------------------------------------------------------------------------------------------------------------------------------------------------------------------------------------------------------------------------------------------------------------------------------------------------------------------------------------------------------------------------------------------------------------------------------------------------------------------------------------------------------------------------------------------------------------------------------------------------------------------------------------------------------------------------|
| Search strategy | (telemedicine OR telehealth OR eHealth OR "digital health") * AND ("tropical neglected diseases" OR "neglected diseases" OR "Buruli Ulcer" OR "Chagas Disease" OR Dengue OR "Dengue fever" OR Arbovirosis OR Chikungunya OR Dracunculiasis OR "Guinea-worm Disease" OR Echinococcosis OR "Foodborne trematodiasis" OR "Foodborne trematode Infections" OR "Human African Trypanosomiasis" OR "Sleeping Sickness" OR Leishmaniasis OR kala-azar OR Leprosy OR "Lymphatic Filariasis" OR Elephantitis OR Mycetoma OR Chromoblastomycosis OR "deep mycoses" OR Onchocerciasis OR "River Blindness" OR Filariasis OR Rabies OR Scabies OR ectoparasitoses OR Schistosomiasis OR "Soil-transmitted helminthiasis" OR "Snakebite envenoming" OR Taeniasis OR cysticercosis OR Trachoma OR Yaws OR "Endemic Treponematoses" or "Noma") ** |
|                 | *Searched in "All fields" in all databases; ** searched in Titles and Abstracts in all databases.                                                                                                                                                                                                                                                                                                                                                                                                                                                                                                                                                                                                                                                                                                                                  |

162

163 Telehealth is a broad term for the use of Information and Communication Technologies  
164 to exchange health information remotely, which conceptually also refers to actions for  
165 purposes other than clinical disease care (e.g., health education or health management)  
166 [3]. This expression was also used in our primary search strategies, however only studies  
167 that carried out activities within the scope of telemedicine mentioned above were selected  
168 [8]. The same criteria were applied to studies retrieved by the terms Digital Health and  
169 eHealth (electronic health).

## 170 Study selection and data extraction

171 The inclusion criteria were: 1. Practical experiences of using telemedicine for individual  
172 clinical care with direct interface between patients or the local provider and others  
173 healthcare professionals by distance; 2. Report at least one NTD from the WHO list as  
174 related to the telemedicine activity applied in the study; 3. Original peer-reviewed articles  
175 and other studies with different methodologies, namely: observational studies,  
176 implementation and intervention studies, pilot studies, qualitative, quantitative or mixed  
177 methods; and 4. Published between January 2000 and February 2024.



178 No language restrictions were applied. Systematic and scoping reviews, case studies,  
179 book chapters, editorials, grey literature and media sources were excluded.

180 Titles and abstracts were selected by two independent reviewers for evaluation according  
181 to the inclusion criteria using the Rayyan automation tool [13]. In the same way, the  
182 selected articles were read in full and classified. The steps were blinded to reduce bias.  
183 All disagreements that arose between the reviewers at each stage of the study selection  
184 process were resolved by a third reviewer.

185 A data extraction instrument for evidence synthesis was created in Microsoft Excel. We  
186 extracted data on the characteristics of the articles (e.g. authors, year, country of the  
187 studied population, main NTD/disease, study design, sample); contextual factors (e.g.,  
188 main technology used, rural or urban area, type of care provider, team responsible for the  
189 telemedicine intervention) and main outcomes/final results.

190 The methodological quality of the studies was not thoroughly evaluated and no critical  
191 appraisal of individual sources of evidence was done.

## 192 **Results**

### 193 **Eligible records**

194 A total of 422 studies were initially retrieved. After excluding 129 duplicates and 250  
195 titles and abstracts that did not meet at least one of the eligibility criteria, 43 articles were  
196 considered potentially relevant for full reading. A total of 8 articles were identified for  
197 inclusion in data extraction. The survey results were reported in full and presented in a  
198 PRISMA-ScR flow diagram (Fig. 2)

199

200 **Figure 2 – PRISMA–ScR chart**

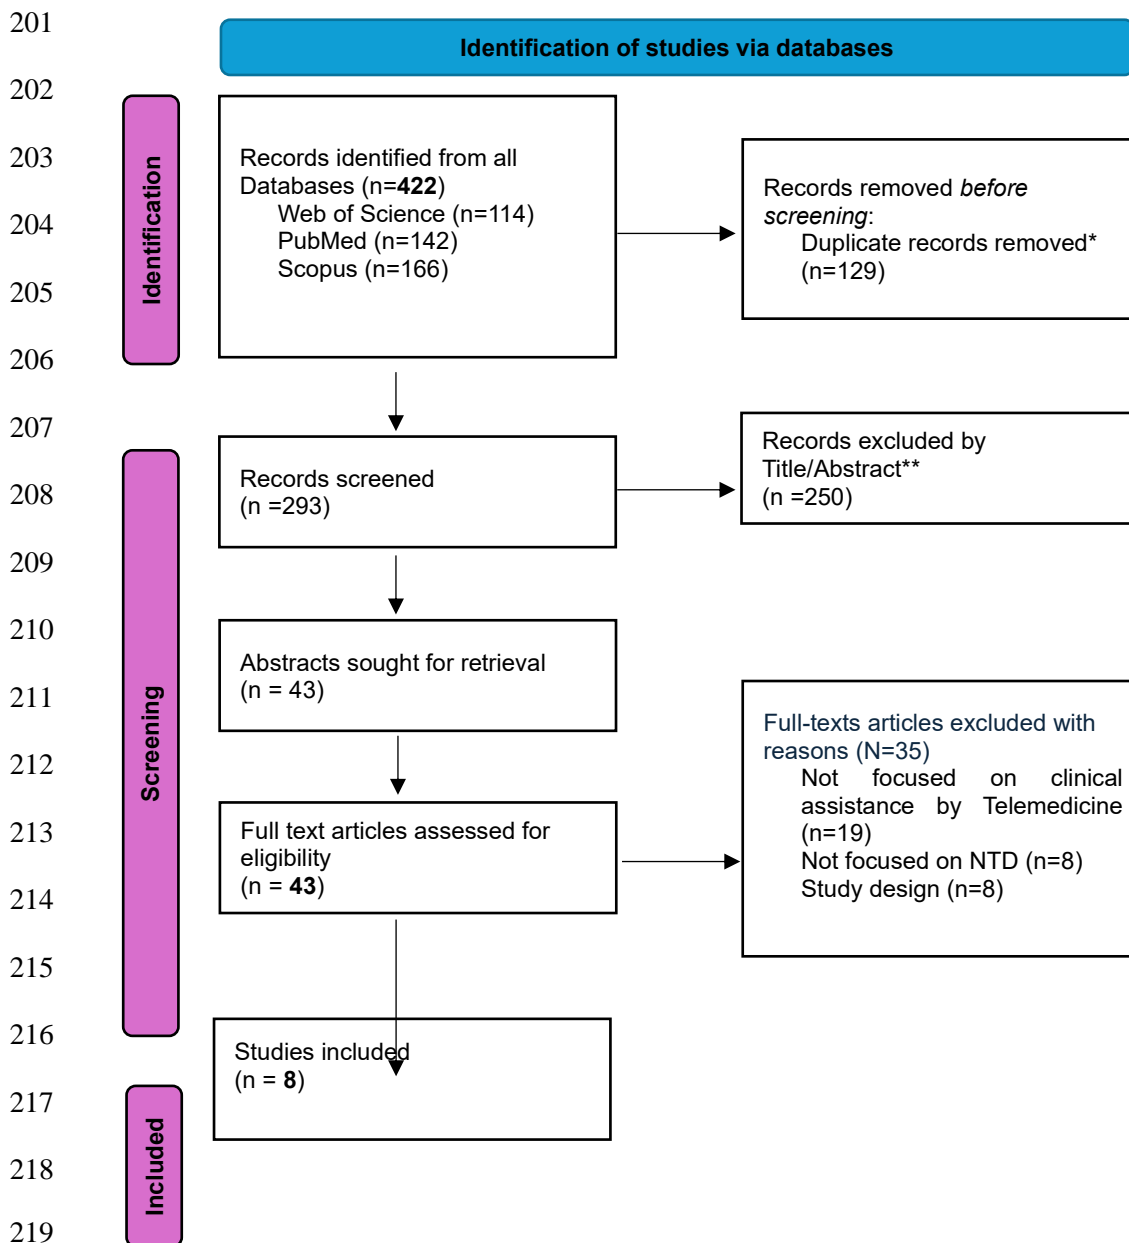

220 \* Duplicates identified and excluded by automation tool *Rayyan* (13); \*\* abstracts selected by researchers  
221 individually in blinded sections and combined using the automation tool *Rayyan* (13).

## 222 Study characteristics

223 The analysis of the final selection showed that 50% of the studies (N=4) were focused on  
224 dermatological diseases (14, 15, 16, 17): one specifically on leprosy (14) (N=1), one  
225 specifically on leishmaniasis (16) (N=1), and two in general dermatological diseases that  
226 included other dermatological NTDs in addition to leprosy and leishmaniasis, such as

227 Buruli ulcer, scabies, yaws, tungiasis and filariasis (15,17). The remaining studies were  
228 related to the management of dengue (25%/N=2) (18, 19), cysticercosis (12.5%/N=1)  
229 (20) and trachoma (12.5%/N=1) (21). The majority of the 21 NTDs were not represented  
230 in the results (Table 1).

231

232 **Table 1 – Characteristics of the studies included in the Scoping review**

233

| Author/ Reference     | Year | Country of healthcare provider                          | Neglected Tropical Disease (NTD)            | Technology/ Telemedicine intervention                                                                                                                                    | Study focus                                                                                                                                                                    | Major Findings                                                                                                                          | Total patients and Number of NTD patients who received telemedicine intervention                                     |
|-----------------------|------|---------------------------------------------------------|---------------------------------------------|--------------------------------------------------------------------------------------------------------------------------------------------------------------------------|--------------------------------------------------------------------------------------------------------------------------------------------------------------------------------|-----------------------------------------------------------------------------------------------------------------------------------------|----------------------------------------------------------------------------------------------------------------------|
| Trindade et al. [14]  | 2008 | Brazil                                                  | Leprosy                                     | Digital Images shared between doctors by Internet-Based System Developed for tele dermatology.                                                                           | Compared the accuracy of the diagnosis sent through images vs. in-person examination in suspected cases of leprosy.                                                            | Telemedicine sensitivity: 78%; specificity: 31%. Diagnostic agreement: 74%.                                                             | N=106 suspect cases of leprosy were reviewed remotely by dermatologists; N=59 confirmed for leprosy                  |
| Galván et al. [18]    | 2014 | Paraguay                                                | Dengue                                      | Telephone calls - BONIS system of community telesurveillance of febrile symptoms of dengue. Free software.                                                               | Feasibility study; evaluated the results of the implementation of the system.                                                                                                  | Increase detection and notification of suspected dengue cases by 157% in 1 year.                                                        | N=157 suspect dengue cases identified remotely by teleconsultations; N=56 confirmed for dengue.                      |
| Konanki et al. [20]   | 2018 | India                                                   | Cysticercosis                               | Telephone calls.                                                                                                                                                         | Compared the accuracy of diagnosis by teleconsultation vs. face-to-face to identify critical clinical events in children with neurocysticercosis and seizures after treatment. | Telemedicine sensitivity: 89%; specificity: 97%; 95% of the events did not require face-to-face consultation.                           | N=228 consultations by phone; N=55 critical clinical complications identified remotely by teleconsultations.         |
| Messagier et al. [15] | 2019 | French Guiana                                           | Leprosy, Leishmaniasis, Scabies, Tungiasis, | French Guiana Platform. Computer software for telemedicine in primary health care units and dermatologists in hospitals, with digital camera.                            | Evaluated the quality and usefulness of the telereferencing system.                                                                                                            | 92% of total cases managed in peripheral health centers, without the need to travel for face-to-face consultations with dermatologists. | N=254 cases managed by the telereferencing system; N=29 NTD cases were reviewed remotely by dermatologists           |
| Naufal et al. [21]    | 2021 | Tanzania. (clinical image classification center in USA) | Trachoma                                    | Image Capture and Processing System (ICAPS). A smartphone photograph and send image to a virtual reading center. Tropical data mHealth app record and transmit the data. | Compared the accuracy of the diagnosis of trachoma eye lesions by teleconsultation vs. face-to-face examination in children.                                                   | Agreement between remote grading of the images compared to the grading by presential provider in field was about 95%.                   | N=1350 patients evaluated for screening; N=54 patients with follicular trachomatous inflammation identified remotely |

|                      |      |              |                                                        |                                                                                         |                                                                                                                                                                                      |                                                                                                                                           |                                                                                                            |
|----------------------|------|--------------|--------------------------------------------------------|-----------------------------------------------------------------------------------------|--------------------------------------------------------------------------------------------------------------------------------------------------------------------------------------|-------------------------------------------------------------------------------------------------------------------------------------------|------------------------------------------------------------------------------------------------------------|
| Pedrotti et al. [19] | 2022 | Brazil       | Dengue                                                 | Videoconferencies - Glob-alMed video-conference software and electronic health records. | Evaluated the effectiveness of teleconsultations in reducing the need for face-to-face medical consultations in patients with mild/moderate acute symptoms during a dengue outbreak. | 5.6% were referred for immediate face-to-face medical evaluation; 94.4% of the cases did not require immediate face-to-face consultation. | N=267 confirmed dengue patients treated remotely by telemedicine                                           |
| Leprosy, Buruli      |      |              |                                                        |                                                                                         |                                                                                                                                                                                      |                                                                                                                                           |                                                                                                            |
| Yotsu et al. [17]    | 2023 | Ivory Coast. | ulcer<br>Lymphatic filariasis,<br>Scabies, and<br>Yaws | eSkinHealth Mobile app (portable electronic medical record and teledermatology)         | Evaluated the app's effectiveness in rural areas for diagnosing and managing skin NTDs and other skin diseases.                                                                      | In the intervention arm, 72.9% (N=151) were diagnosed by the platform, 79 of them NTDs.                                                   | N=151 dermatologic cases were diagnosed on app; N=79 NTD diagnosed and treated remotely by dermatologists; |
| Castillo et al. [16] | 2023 | Colombia     | Leishmaniasis                                          | Mobile app - Guaral +ST app (teledermatology)                                           | Compared the clinical following of leishmaniasis treatment to by telemedicine to face-to-face care.                                                                                  | Telemedicine increased the proportion of patients monitored at week 26 of treatment by around 53%.                                        | N=49 cutaneous leishmaniasis treatments monitored by app                                                   |

234

235 The temporal analysis demonstrated that 50% of the studies (n=4) were published  
 236 between 2021 and 2023, while the other 50% were published between 2008 and 2019,  
 237 which points to an acceleration of studies after the Covid-19 pandemic, following the  
 238 international trend (22). The length of the telemedicine intervention studies reviewed  
 239 ranged from 2 to 18 months.

## 240 Contexts

241 Regarding the geographic profile of the populations studied, 62,5% of the researches took  
 242 place in South America (N=5), with emphasis on Brazil (N=2); 25% were conducted in  
 243 Africa (N=2) and 12,5% in South Asia (N=1). Four studies were conducted in countries  
 244 classified as upper-middle-income economies (23) (Brazil, Colombia, Paraguay), three

245 studies in lower-middle income economies (India, Ivory Coast, Tanzania), and one in a  
246 high-income economy country (Guyana). No study was conducted in a country with a  
247 low-income economy.

248 A significant proportion of studies (62.5%, n=5) had telemedicine providers who were  
249 part of the local primary care team (São Paulo, Brazil; Asunción, Paraguay; Tumaco,  
250 Colombia; Cayenne, French Guyana; and Sinfra, Ivory Coast), and two of them utilized  
251 telemedicine to enable communication between the local team and the hospital (14, 15).  
252 One of the other studies was carried out only with staff from a tertiary hospital (New  
253 Delhi, India); one in a temporary emergency hospital due to a dengue outbreak (São  
254 Paulo, Brazil); and one worked in conjunction with a district-level community prevalence  
255 research team (Chamwino, Tanzania), which is still the only study where one arm of the  
256 clinical assessment was carried out in a different country (United States).

257 Finally, half of the 8 studies (50%, N=4) developed at least one of the arms in remote  
258 and/or rural areas (15, 16, 17, 21), three in urban settings (14, 18, 19) and in one it was  
259 not described (20).

## 260 **Telemedicine interventions and outcomes**

261 Table 2 summarizes the characteristics of the telemedicine technologies studied. Only  
262 three studies investigated real-time synchronous interventions of consultations between  
263 remote patients and healthcare providers, two of which were via ordinary telephone calls  
264 (18, 20) and only one via videoconference (19). In all five other articles, telemedicine  
265 was carried out with asynchronous transmission of medical data (e.g. images, descriptive  
266 clinical notes), involving teleconsultations for case management between healthcare  
267 professionals located in different services (14, 15, 16, 17, 21).

268

269 **Table 2 Thematic framework - characterization of the telemedicine**  
 270 **interventions and contexts**

|                                                                                                                        | N | References                         |
|------------------------------------------------------------------------------------------------------------------------|---|------------------------------------|
| <b>Telemedicine intervention</b>                                                                                       |   |                                    |
| Consultations between remote person and healthcare provider - real-time /synchronous telemedicine                      | 3 | [18], [19], [20]                   |
| Transmission of medical data (e.g. images, notes) mediated by distant healthcare providers - asynchronous telemedicine | 5 | [14], [15], [16], [17], [21]       |
| <b>Communication technology</b>                                                                                        |   |                                    |
| Telephone                                                                                                              | 2 | [18], [20]                         |
| Videoconference                                                                                                        | 1 | [19]                               |
| Mobile application                                                                                                     | 3 | [16], [17], [21]                   |
| Data/images submission platform                                                                                        | 2 | [14], [15]                         |
| <b>Clinical applicability</b>                                                                                          |   |                                    |
| Telemedicine to ensure patient access to diagnostic                                                                    | 6 | [14], [15], [17], [18], [20], [21] |
| Telemedicine to ensure patient access to treatment                                                                     | 1 | [19]                               |
| Telemedicine to monitor patient treatment                                                                              | 1 | [16]                               |
| <b>Telemedicine providers involved</b>                                                                                 |   |                                    |
| Primary Health Care team                                                                                               | 5 | [14], [15], [16], [17], [18]       |
| Hospital team                                                                                                          | 4 | [14], [15], [19], [20]             |
| Other                                                                                                                  | 1 | [21]                               |
| <b>Location where the study population resides</b>                                                                     |   |                                    |
| Rural or/and remote                                                                                                    | 4 | [15], [16], [17], [21]             |
| Urban                                                                                                                  | 3 | [14], [18], [19]                   |
| Not mentioned                                                                                                          | 1 | [20]                               |
| Latin America                                                                                                          | 5 | [14], [15], [16], [18], [19]       |
| Africa                                                                                                                 | 2 | [17], [21]                         |
| Asia                                                                                                                   | 1 | [20]                               |
| Upper-middle-income economy                                                                                            | 4 | [14], [16], [18], [19]             |
| Lower-middle-income economy                                                                                            | 3 | [17], [20], [21]                   |
| High income country                                                                                                    | 1 | [15]                               |
| <b>Disease studied</b>                                                                                                 |   |                                    |
| Leprosy                                                                                                                | 3 | [14], [15], [17]                   |
| Leishmaniasis                                                                                                          | 2 | [15], [16]                         |
| Dengue                                                                                                                 | 2 | [18], [19]                         |
| Scabies                                                                                                                | 2 | [15], [17]                         |
| Cysticercosis                                                                                                          | 1 | [20]                               |
| Trachoma                                                                                                               | 1 | [21]                               |
| Tungiasis                                                                                                              | 1 | [15]                               |
| Buruli ulcer, Lymphatic filariasis, Yaws                                                                               | 1 | [17]                               |

271

272 Regarding the telemedicine software used, two studies worked with specific telemedicine  
 273 platforms for sending clinical data and images (14, 15) and one study tested a software

274 for medical videoconferencing (19), while the use of mobile applications for remote care  
275 of NTDs occurred in three studies (16,17,21).

276 Most studies (75%, n=6) sought to evaluate the applicability of remote NTD  
277 tediagnosis, but only three of them (37,5%) compared the effectiveness/accuracy of  
278 remote diagnosis via telemedicine with in-person medical care as a gold standard (14, 20,  
279 21), obtaining favorable results for the use of teleconsultation. Other primary results on  
280 the use of telemedicine found in the studies were: a significant reduction in the need for  
281 medical in-person specialized consultations (37,5%/n=3) (15, 19, 20); increased disease  
282 detection capacity (25%/n=2) (17, 18), and improved quality of clinical follow up by  
283 healthcare providers using a mobile app (12,5%/n=1) (16).

## 284 **Discussion**

285 This scoping review allowed the general mapping of available scientific production  
286 related to NTD care via telemedicine. The majority of the 21 NTDs were not represented  
287 in the results. The study demonstrated that there is a gap in recommendations for the  
288 clinical management of acute and chronic NTDs through telemedicine, revealing that this  
289 resource is still largely underutilized for the care of this group of infectious diseases of  
290 poverty. By way of comparison with a single other infectious disease, a bibliometric study  
291 published in May 2022 that investigated the application of Telemedicine in the care of  
292 COVID-19 retrieved 5,224 research papers published up to that time (24). A number  
293 12,37 times greater than what we found for the 21 NTDs together until 2024.

294 Studies that evaluated the accuracy of remote diagnosis demonstrated good effectiveness  
295 for leprosy, trachoma and complications of neurocysticercosis. There was also a  
296 significant reduction in the need for in-person specialized medical consultations when  
297 telemedicine alternatives were implemented for the care of dengue fever and some



298 dermatological NTDs, in addition to an improvement in the quality of clinical monitoring  
299 of cutaneous leishmaniasis using mobile health technologies. Low-income countries  
300 appear to remain excluded from advances in telemedicine for NTD, suggesting that the  
301 challenges of implementing remote care services in extreme poverty contexts are a  
302 relevant gap and an imminent challenge.

### 303 **Remote care for Neglected Tropical Diseases**

304 Cutaneous NTDs stood out both for their applicability and level of evidence in remote  
305 clinical monitoring. The main findings in this review around teledermatology were  
306 already expected and corroborate the evidence on the previous consolidation of this  
307 specialty in the international telehealth scenario, including NTDs (25, 26). The ease of  
308 managing clinical parameters in dermatology through photographs and videos,  
309 increasingly accessible on modern devices, seems to be a facilitator. The use of mobile  
310 phones for healthcare (mobile health, currently called mHealth) is a growing market that  
311 was also shown to be more focused on neglected skin diseases than other NTDs in our  
312 study results. It is important to highlight, however, that there are also limitations that make  
313 substitutive and exclusive longitudinal follow-up via telemedicine impossible for some  
314 diseases. For cutaneous leishmaniasis, for example, the mucosal lesions would be difficult  
315 to verify through photographs and would require in-person visits to the service.

316 Dengue is a seasonal NTD transmitted by mosquitoes with high morbidity that can  
317 overwhelm emergency services. The use of telemedicine in dengue outbreaks has  
318 emerged as an effective strategy for early diagnosis and medical assessment of low-to-  
319 moderate risk cases, expanding case identification and preventing progression to severity.  
320 However, the urgency of the global epidemiological scenario of the disease (27) suggests  
321 that this resource could be more often used by health systems in order to avoid preventable

322 deaths in areas with limited health service coverage. Digital health consultations  
323 combined with point-of-care diagnostic methods, such as rapid tests, is a window of  
324 opportunity to expand the differential diagnosis of acute febrile illnesses in the large  
325 endemic regions of Latin America and Southeast Asia and may also be useful in African  
326 regions where there is the challenge of differential diagnosis with malaria.

327 Trachoma is an infectious eye disease and an important cause of blindness in poor, rural  
328 and remote areas of the world. In our review we observed that the integration between  
329 screening programs and remote diagnosis by telemedicine can be a feasible advance in its  
330 elimination plan. One study uses a mHealth application suggesting an advance  
331 incorporation of mobile health resources in trachoma care (21). However, no telehealth  
332 actions focused on preventive chemotherapy for trachoma in endemic communities were  
333 identified in our review. The development of integrated preventive chemotherapy  
334 telemonitoring actions could be beneficial to support community strategies for the control  
335 and elimination of other NTDs, such as onchocerciasis, lymphatic filariasis,  
336 schistosomiasis and soil-transmitted helminthiasis in isolated communities at risk.

337 Clinical monitoring by telephone to track seizures in patients with neurocysticercosis  
338 proved to be a relevant strategy for remote monitoring of this chronic disease, avoiding  
339 unnecessary trips to clinical follow-up, without the need for sophisticated technology  
340 (20). For other long-term NTDs typical of remote rural areas, such as Chagas Disease and  
341 Human African Trypanosomiasis, no results were recovered, although it was expected  
342 that continuous chronic telemonitoring of these patients could have good applicability, as  
343 it would avoid unnecessary trips to distant specialized centers for clinical monitoring of  
344 complications. Despite the emphasis that zoonotic diseases have received around the  
345 world after the Covid-19 pandemic, and the advancement of the international debate on  
346 One Health approaches, the clinical management of some zoonotic NTDs seem to out of

347 sight by the global digital health agenda, with technological advances more concentrated  
348 in sectors like vectors surveillance (28, 29) or digital microbiology (30).

## 349 **Telemedicine scenarios**

350 Most interventions took place in Latin America. We identified a shortage of studies in  
351 African countries and the lack of innovative health experiences aimed at this region is a  
352 permanent challenge in controlling NTDs. Although the African continent accounts for  
353 around 40% of the global NTD burden (31), its broadband internet penetration rate was  
354 still around 33% in 2020 (32). Applications that work offline and do not require constant  
355 Internet can be part of the solution, but the challenge of providing access to person-  
356 centered services of remote healthcare especially in the sub-Saharan region requires  
357 complex multisectoral efforts and local engagement. The shortage of skilled health  
358 workforce in this region is a critical problem for addressing prevalent diseases, and  
359 consultations with specialists located in distant centers may be a good alternative in  
360 supporting infectious disease care (33). Furthermore, investment in public health systems  
361 with broad coverage can contribute to decentralized care in communities affected by  
362 NTDs, but also requires local governance policies committed to this agenda.

363 NTDs are closely related to the territory's environmental health conditions, and  
364 Telemedicine applied at the level of primary health care, as seen in most of the studies,  
365 has the potential to expand digital community strategies for local surveillance and better  
366 epidemiological control. Improving the management of clinical communication between  
367 different levels of care (e.g. primary care centers and tertiary hospitals) through integrated  
368 Telemedicine platforms can also bring potential benefits to continuity,  
369 comprehensiveness and clinical coordination, considered internationally as important  
370 pillars for strengthening health systems centered on primary care (34). These results are

371 also important to strengthen joint action between general practitioners and focal  
372 specialists through telemedicine in the management of patients with NTD.

### 373 **The implementation of telemedicine**

374 The scarcity of results on long-term telemedicine implementations limits the  
375 understanding of the real barriers to its incorporation into services. As most of the studies  
376 identified in this review consisted of proofs of concept or pilot tests, it would be important  
377 to investigate which initiatives remained in operation, to assess the factors that may be  
378 associated with their success and sustainability in real-world settings over time. The  
379 integration of digital health systems into care networks emerges as a challenge, especially  
380 in health systems with few resources, as their effectiveness depends on local  
381 infrastructure, internet accessibility and connection quality, in addition to disruptive  
382 changes in the existing healthcare routine. However, the real impact of this operation on  
383 the long-term routine of providers was not explored in depth in most of the selected  
384 studies.

385 On the way to mitigate global inequities in access to internet and  
386 communication/information technologies in health, the implementation of telemedicine  
387 on a large scale requires complex efforts from several areas for its incorporation into  
388 health services: legal rules; systems interoperability; person-centered clinical  
389 telemedicine protocols; specific training for health providers; and promotion of patients'  
390 digital literacy - which can be difficult for populations with low socioeconomic status.  
391 Another aspect that should be considered in telemedicine aimed at NTD is digital security  
392 and ethical regulation practices. Concern about ethical care when sending sensitive health  
393 data virtually is mandatory in the development of safe telemedicine tools in poor

394 countries, that sometimes have limited legislation to guarantee the data protection of  
395 vulnerable populations.

396 Most of the initiatives presented in the studies occurred asynchronously. Only one study  
397 presented a structured telemedicine platform that offered teleconsultation via  
398 videoconference in real time between patients and doctors, but it did not eliminate the  
399 need for the patient to travel to the health service, since the medical teleconsultation took  
400 place after an in-person assessment by nursing staff. Henceforth, the use of mobile  
401 applications for remote care for NTDs emerges as a promising resource (16,17,21).

402 The absence of local validated clinical protocols for remote video consultations that  
403 replace face-to-face care could also make clinical research in this area still fragile from  
404 an ethical-legal perspective, especially in acute complications with potential for severity.  
405 Therefore, the development of guidelines for remote care for NTDs, standardizing safe  
406 remote care, also emerged as an important gap to be filled, since nothing in this regard  
407 was mentioned in the studies.

## 408 **Limitations**

409 Publication bias is a limitation of this work, as we only considered articles published in  
410 journals and the search did not cover grey literature. To overcome this problem we used  
411 broader search strategies to map local experiences originating especially in low-income  
412 settings.

413 As NTD constitute a clinically diverse group of diseases, with different durations, stages  
414 of evolution and possible complications, in-depth comparative variables for intervention  
415 approaches are scarce. However, we highlight the main common characteristics and  
416 interventions aspects.

417 The group of neglected fungal diseases is not specified in the WHO list, described as  
418 “mycetoma, chromoblastomycosis and other deep mycoses” (12), making it difficult to  
419 include each of these diseases in the search strategy (Fig. 1), which may contribute to  
420 selection bias. For example, although paracoccidiomycosis and histoplasmosis are  
421 relevant problems in the Americas, we did not find consistent evidence to support the  
422 nominal inclusion of these pathologies in our review search strategy (35,36).

## 423 **Conclusion**

424 Telemedicine applied to NTDs is not a new field, but the results of this review  
425 demonstrate that the use is limited compared to the global magnitude of NTDs. Although  
426 there is a recent increase in academic production on the topic after the COVID-19  
427 pandemic, the evidence is restricted to a small group of diseases and the technologies  
428 used were, in most cases, asynchronous.

429 Telemedicine has emerged globally as a potentially promising resource for reducing  
430 disparities in access to healthcare services. Although its popularity has grown following  
431 the pandemic experience, the research gap regarding its effectiveness in the clinical  
432 treatment of NTDs is still large. The limited data available from these studies suggests  
433 that telemedicine is feasible compared to conventional care, but further in-depth studies  
434 are needed to compare in-person and remote consultations and to investigate the level of  
435 quality of current evidence and the benefits of this modality. Cost-effectiveness results  
436 are also needed to support decision-makers, especially in poor healthcare settings.

## 437 **Information support**

## 438 **Funding**

439 The main author of the article receives a doctoral scholarship from the Foundation for  
440 Science and Technology (FCT Portugal – [www.fct.pt](http://www.fct.pt)) under DOI registration  
441 10.54499/UI/BD/151068/2021 (<https://doi.org/10.54499/UI/BD/151068/2021>)

442 The funder had no role in study design, data collection and analysis, decision to publish,  
443 or preparation of the manuscript.

## 444 **Competing interests**

445 The authors declare that there are no conflicts of interest related to this article.

## 446 **Contributors**

447 CV conceptualized the project and study design and was responsible for resolving  
448 divergent synthesis decisions. FS and CJ conducted the search and screening of literature  
449 and data extraction. FS led the theme analysis and writing of the manuscript. MW, LL  
450 and HS supported methodological and writing review of the manuscript.

## 451 **References**

- 452 1. World Health Organization. Ending the neglect to attain the Sustainable  
453 Development Goals: a road map for neglected tropical diseases 2021–2030.  
454 Geneva: World Health Organization; 2021. Available from:  
455 [https://www.who.int/teams/control-of-neglected-tropical-diseases/ending-ntds-  
456 together-towards-2030](https://www.who.int/teams/control-of-neglected-tropical-diseases/ending-ntds-together-towards-2030).
- 457 2. World Health Organization. Global report on neglected tropical diseases 2023.  
458 Geneva: World Health Organization; 2023. Available from:  
459 [https://www.who.int/teams/control-of-neglected-tropical-diseases/global-report-  
460 on-neglected-tropical-diseases-2023](https://www.who.int/teams/control-of-neglected-tropical-diseases/global-report-on-neglected-tropical-diseases-2023)

- 461 3. World Health Organization. Global diffusion of eHealth: Making universal health  
462 coverage achievable. Report of the third global survey on eHealth. Geneva: WHO  
463 Global Observatory for eHealth; 2016. Available from:  
464 [https://apps.who.int/iris/bitstream/handle/10665/252529/9789241511780-](https://apps.who.int/iris/bitstream/handle/10665/252529/9789241511780-eng.pdf?sequence=1)  
465 [eng.pdf?sequence=1](https://apps.who.int/iris/bitstream/handle/10665/252529/9789241511780-eng.pdf?sequence=1).
- 466 4. World Health Organization. Global strategy on digital health 2020-2025. Geneva:  
467 World Health Organization; 2020. Available from:  
468 <https://www.who.int/publications/i/item/9789240020924>
- 469 5. Tilahun B, Gashu KD, Mekonnen ZA, Endehabtu BF, Angaw DA. Mapping the  
470 role of digital health technologies in the case detection, management, and  
471 treatment outcomes of neglected tropical diseases: a scoping review. Trop Med  
472 Health. 2021; 49:1-10. DOI: 10.1186/s41182-021-00307-1
- 473 6. Telemedicine 2020 and the next decade. Lancet. 2020;395(10227):859. DOI:  
474 10.1016/S0140-6736(20)30424-4
- 475 7. Mahmoud K, Jaramillo C, Barteit S. Telemedicine in Low-and Middle-Income  
476 Countries During the COVID-19 Pandemic: A Scoping Review. Frontiers in  
477 Public Health. 2022; 10:914423. DOI: 10.3389/fpubh.2022.914423
- 478 8. World Health Organization. Classification of digital interventions, services and  
479 applications in health: a shared language to describe the uses of digital technology  
480 for health, 2nd ed. Geneva: World Health Organization; 2021. Available from:  
481 <https://www.who.int/publications/i/item/9789240081949>
- 482 9. Ghassemi M, Oakden-Rayner L, Beam AL. The false hope of current approaches  
483 to explainable artificial intelligence in health care. Patterns. 2021;2(11):100321.  
484 DOI: 10.1016/S2589-7500(21)00208-9



- 485 10. Aromataris E, Munn Z. Joanna Briggs Institute Reviewer's Manual. Adelaide: The  
486 Joanna Briggs Institute; 2020
- 487 11. Tricco AC, Lillie E, Zarin W, O'Brien KK, Colquhoun H, Levac D, et al. PRISMA  
488 Extension for Scoping Reviews (PRISMA ScR): Checklist and Explanation. Ann  
489 Intern Med. 2018;169:467-473. DOI: 10.7326/M18-0850
- 490 12. World Health Organization. Neglected tropical diseases. [Updated 2023 Feb 22].  
491 Available from: [https://www.who.int/health-topics/neglected-tropical-](https://www.who.int/health-topics/neglected-tropical-diseases#tab=tab_1)  
492 [diseases#tab=tab\\_1](https://www.who.int/health-topics/neglected-tropical-diseases#tab=tab_1)
- 493 13. Ouzzani HM, Hammady H, Fedorowicz Z, Elmagarmid A. Rayyan — a web and  
494 mobile app for systematic reviews. Syst Rev. 2016;5:210. DOI: 10.1186/s13643-  
495 016-0384-4.
- 496 14. Trindade MA, Wen CL, Neto CF, Escuder MM, Andrade VLG, Yamashitafuji  
497 TMT, et al. Accuracy of store-and-forward diagnosis in leprosy. J Telemed  
498 Telecare. 2008;14(4):208-210. DOI: 10.1258/jtt.2008.071203
- 499 15. Messagier AL, Blaizot R, Couppié P, Delaigue S. Tele dermatology use in remote  
500 areas of French Guiana: experience from a long-running system. Front Public  
501 Health. 2019; 7:387. DOI: 10.3389/fpubh.2019.00387
- 502 16. Castillo M, Alexander N, Rubiano L, Rojas C, Navarro A, Rincon D, et al.  
503 Randomized trial evaluating an mHealth intervention for the early community-  
504 based detection and follow-up of cutaneous leishmaniasis in rural Colombia.  
505 PLoS Negl Trop Dis. 2023;17(3). DOI: 10.1371/journal.pntd.0011180
- 506 17. Yotsu RR, Almamy D, Vagamon B, Ugai K, Itoh S, Koffi YD, et al. An mHealth  
507 App (eSkinHealth) for Detecting and Managing Skin Diseases in Resource-  
508 Limited Settings: Mixed Methods Pilot Study. JMIR Dermatol. 2023;6. DOI:  
509 10.2196/46295

- 510 18. Galvan P, Cane V, Samudio M, Cabello A, Cabral M, Basogain X, et al.  
511 Implementation of a community tele-epidemiological surveillance system using  
512 information and communication technologies in Paraguay. *Rev Panam Salud*  
513 *Publica*. 2014;35(5):353-359. Available in:  
514 <https://pubmed.ncbi.nlm.nih.gov/25211561/>
- 515 19. Pedrotti CH, Accorsi TA, Moreira FT, Lima KDA, Köhler KF, Gaz MV, et al.  
516 Telemedicine medical evaluation of low-risk patients with dengue during an  
517 outbreak may be an option in reducing the need for on-site physicians. *Int J Infect*  
518 *Dis*. 2022; 121:106-111. DOI: 10.1016/j.ijid.2022.04.059
- 519 20. Konanki R, Gulati S, Prasad K, Saini L, Pandey RM, Paul VK. Comparison of  
520 telephone with face-to-face consultation for follow up of Neurocysticercosis.  
521 *Epilepsy Res*. 2018; 145:110-115. DOI: 10.1016/j.seizure.2020.10.002
- 522 21. Naufal F, Brady CJ, Wolle MA, Kashaf MS, Mkocho H, Bradley C, et al.  
523 Evaluation of photography using head-mounted display technology (ICAPS) for  
524 district Trachoma surveys. *PLoS Negl Trop Dis*. 2021;15(11). DOI:  
525 10.1371/journal.pntd.0009928
- 526 22. Maugeri A, Barchitta M, Basile G, Agodi A. Public and Research Interest in  
527 Telemedicine From 2017 to 2022: Infodemiology Study of Google Trends Data  
528 and Bibliometric Analysis of Scientific Literature. *J Med Internet Res*. 2024;26.  
529 DOI: 10.2196/50088.
- 530 23. World Bank. (2024). World Bank country and lending groups [Data file].  
531 Retrieved from  
532 [https://datahelpdesk.worldbank.org/knowledgebase/articles/906519-world-bank-](https://datahelpdesk.worldbank.org/knowledgebase/articles/906519-world-bank-country-and-lending-groups)  
533 [country-and-lending-groups](https://datahelpdesk.worldbank.org/knowledgebase/articles/906519-world-bank-country-and-lending-groups) [Accessed in Jun 01, 2024]

- 534 24. Lan X, Yu H, Cui L. Application of telemedicine in COVID-19: a bibliometric  
535 analysis. *Front Public Health*. 2022; 10:908756. DOI:  
536 10.3389/fpubh.2022.908756
- 537 25. Carrion C, Robles N, Sola-Morales O, Aymerich M, Postigo JAR. Mobile Health  
538 Strategies to Tackle Skin Neglected Tropical Diseases with Recommendations  
539 From Innovative Experiences: Systematic Review. *JMIR Mhealth Uhealth*.  
540 2020;8(12). DOI: 10.2196/22478
- 541 26. Yotsu RR, Ding Z, Hamm J, Blanton RE. Deep Learning for AI-Based Diagnosis  
542 of Skin-Related Neglected Tropical Diseases: A Pilot Study. *PLoS Negl Trop Dis*.  
543 2023;17(8). DOI: 10.1101/2023.03.14.23287243
- 544 27. Pan American Health Organization. Situation Report No 20 - Dengue  
545 Epidemiological Situation in the Region of the Americas - Epidemiological Week  
546 20, 2024. Washington, D.C.: PAHO; 2024. Available in:  
547 [https://www.paho.org/en/documents/situation-report-no-20-dengue-](https://www.paho.org/en/documents/situation-report-no-20-dengue-epidemiological-situation-region-americas-epidemiological)  
548 [epidemiological-situation-region-americas-epidemiological](https://www.paho.org/en/documents/situation-report-no-20-dengue-epidemiological-situation-region-americas-epidemiological)
- 549 28. Delgado-Noguera LA, Hernández-Pereira CE, Ramírez JD, Hernández C,  
550 Velasquez-Ortiz N, Clavijo J, et al. Tele-entomology and tele-parasitology: A  
551 citizen science-based approach for surveillance and control of Chagas disease in  
552 Venezuela. *Parasite Epidemiol Control*. 2022 Sep 8;19. DOI:  
553 10.1016/j.parepi.2022.e00273
- 554 29. Lwin MO, Jayasundar K, Sheldenkar A, Wijayamuni R, Wimalaratne P, Ernst KC,  
555 Foo S. Lessons from the Implementation of Mo-Buzz, a Mobile Pandemic  
556 Surveillance System for Dengue. *JMIR Public Health Surveill*. 2017 Oct 2;3(4).  
557 DOI: 10.2196/publichealth.7376.

- 558 30. Hasker E, Kwete J, Inocencio da Luz R, Mpanya A, Bebronne N, Makabuza J, et  
559 al. Innovative digital technologies for quality assurance of diagnosis of human  
560 African trypanosomiasis. PLoS Negl Trop Dis. 2018;12(9). DOI:  
561 10.1371/journal.pntd.0006664
- 562 31. World Health Organization Regional Office for Africa. Promising Progress on  
563 Neglected Tropical Diseases in Africa [Internet]. World Health Organization;  
564 2022. Available from: [https://www.afro.who.int/news/promising-progress-](https://www.afro.who.int/news/promising-progress-neglected-tropical-diseases-africa)  
565 [neglected-tropical-diseases-africa](https://www.afro.who.int/news/promising-progress-neglected-tropical-diseases-africa)
- 566 32. World Health Organization. Regional Committee for Africa, 71. Framework for  
567 Implementing the Global Strategy on Digital Health in the African Region. World  
568 Health Organization Regional Office for Africa; 2021. Available from:  
569 <https://iris.who.int/handle/10665/348981>.
- 570 33. Dodoo JE, Al-Samarraie H, Alsswey A. The development of telemedicine  
571 programs in Sub-Saharan Africa: Progress and associated challenges. Health  
572 Technol. 2022;12:33-46. doi: 10.1007/s12553-021-00626-7
- 573 34. Hone T, Macinko J, Millett C. Revisiting Alma-Ata: what is the role of primary  
574 health care in achieving the Sustainable Development Goals? The Lancet.  
575 2018;392(10157):1561-1562. DOI: 10.1016/S0140-6736(18)31829-4
- 576 35. Queiroz-Telles F, Mendes-Giannini MJ, Rodrigues ME, et al. The case for  
577 paracoccidioidomycosis to be accepted as a neglected tropical (fungal) disease.  
578 PLoS Negl Trop Dis. 2019;13(5). DOI: 10.1371/journal.pntd.0007195
- 579 36. Bongomin F, Hage CA, Azevedo VS, et al. Histoplasmosis in Africa: An emerging  
580 or a neglected disease? PLoS Negl Trop Dis. 2017;11(10). DOI:  
581 10.1371/journal.pntd.0006046
- 582

583 **Supporting information**

584 **Supplement 1**

585 **S1 Table - Preferred Reporting Items for Systematic reviews and Meta-Analyses**

586 **extension for Scoping Reviews (PRISMA-ScR) Checklist applied for the review with**

587 **respective corresponding pages**

| SECTION                           | ITEM | PRISMA-ScR CHECKLIST ITEM                                                                                                                                                                                                                                                 | REPORTED ON PAGE # |
|-----------------------------------|------|---------------------------------------------------------------------------------------------------------------------------------------------------------------------------------------------------------------------------------------------------------------------------|--------------------|
| <b>TITLE</b>                      |      |                                                                                                                                                                                                                                                                           |                    |
| Title                             | 1    | Identify the report as a scoping review.                                                                                                                                                                                                                                  | #1                 |
| <b>ABSTRACT</b>                   |      |                                                                                                                                                                                                                                                                           |                    |
| Structured summary                | 2    | Provide a structured summary that includes (as applicable): background, objectives, eligibility criteria, sources of evidence, charting methods, results, and conclusions that relate to the review questions and objectives.                                             | #2                 |
| <b>INTRODUCTION</b>               |      |                                                                                                                                                                                                                                                                           |                    |
| Rationale                         | 3    | Describe the rationale for the review in the context of what is already known. Explain why the review questions/objectives lend themselves to a scoping review approach.                                                                                                  | #4                 |
| Objectives                        | 4    | Provide an explicit statement of the questions and objectives being addressed with reference to their key elements (e.g., population or participants, concepts, and context) or other relevant key elements used to conceptualize the review questions and/or objectives. | #6                 |
| <b>METHODS</b>                    |      |                                                                                                                                                                                                                                                                           |                    |
| Protocol and registration         | 5    | Indicate whether a review protocol exists; state if and where it can be accessed (e.g., a Web address); and if available, provide registration information, including the registration number.                                                                            | #6                 |
| Eligibility criteria              | 6    | Specify characteristics of the sources of evidence used as eligibility criteria (e.g., years considered, language, and publication status), and provide a rationale.                                                                                                      | #8                 |
| Information sources*              | 7    | Describe all information sources in the search (e.g., databases with dates of coverage and contact with authors to identify additional sources), as well as the date the most recent search was executed.                                                                 | #8                 |
| Search                            | 8    | Present the full electronic search strategy for at least 1 database, including any limits used, such that it could be repeated.                                                                                                                                           | #8                 |
| Selection of sources of evidence† | 9    | State the process for selecting sources of evidence (i.e., screening and eligibility) included in the scoping review.                                                                                                                                                     | #8                 |
| Data charting process‡            | 10   | Describe the methods of charting data from the included sources of evidence (e.g., calibrated forms or forms that have been tested by the team before their use, and whether data charting was done independently or in duplicate) and any processes                      | #9                 |

| SECTION                                               | ITEM | PRISMA-ScR CHECKLIST ITEM                                                                                                                                                                             | REPORTED ON PAGE # |
|-------------------------------------------------------|------|-------------------------------------------------------------------------------------------------------------------------------------------------------------------------------------------------------|--------------------|
|                                                       |      | for obtaining and confirming data from investigators.                                                                                                                                                 |                    |
| Data items                                            | 11   | List and define all variables for which data were sought and any assumptions and simplifications made.                                                                                                | #10                |
| Critical appraisal of individual sources of evidence§ | 12   | If done, provide a rationale for conducting a critical appraisal of included sources of evidence; describe the methods used and how this information was used in any data synthesis (if appropriate). | -                  |
| Synthesis of results                                  | 13   | Describe the methods of handling and summarizing the data that were charted.                                                                                                                          | #10                |
| <b>RESULTS</b>                                        |      |                                                                                                                                                                                                       |                    |
| Selection of sources of evidence                      | 14   | Give numbers of sources of evidence screened, assessed for eligibility, and included in the review, with reasons for exclusions at each stage, ideally using a flow diagram.                          | #10                |
| Characteristics of sources of evidence                | 15   | For each source of evidence, present characteristics for which data were charted and provide the citations.                                                                                           | #12                |
| Critical appraisal within sources of evidence         | 16   | If done, present data on critical appraisal of included sources of evidence (see item 12).                                                                                                            | -                  |
| Results of individual sources of evidence             | 17   | For each included source of evidence, present the relevant data that were charted that relate to the review questions and objectives.                                                                 | #15                |
| Synthesis of results                                  | 18   | Summarize and/or present the charting results as they relate to the review questions and objectives.                                                                                                  | #15                |
| <b>DISCUSSION</b>                                     |      |                                                                                                                                                                                                       |                    |
| Summary of evidence                                   | 19   | Summarize the main results (including an overview of concepts, themes, and types of evidence available), link to the review questions and objectives, and consider the relevance to key groups.       | #16                |
| Limitations                                           | 20   | Discuss the limitations of the scoping review process.                                                                                                                                                | #21                |
| Conclusions                                           | 21   | Provide a general interpretation of the results with respect to the review questions and objectives, as well as potential implications and/or next steps.                                             | #22                |
| <b>FUNDING</b>                                        |      |                                                                                                                                                                                                       |                    |
| Funding                                               | 22   | Describe sources of funding for the included sources of evidence, as well as sources of funding for the scoping review. Describe the role of the funders of the scoping review.                       | #23                |

588 JBI = Joanna Briggs Institute; PRISMA-ScR = Preferred Reporting Items for Systematic reviews and Meta-Analyses  
589 extension for Scoping Reviews.

590 \* Where *sources of evidence* (see second footnote) are compiled from, such as bibliographic databases, social media  
591 platforms, and Web sites.

592 † A more inclusive/heterogeneous term used to account for the different types of evidence or data sources (e.g.,  
593 quantitative and/or qualitative research, expert opinion, and policy documents) that may be eligible in a scoping review  
594 as opposed to only studies. This is not to be confused with *information sources* (see first footnote).

595 ‡ The frameworks by Arksey and O'Malley and Levac and colleagues and the JBI guidance refer to the process of data  
596 extraction in a scoping review as data charting.

597 § The process of systematically examining research evidence to assess its validity, results, and relevance before using  
598 it to inform a decision. This term is used for items 12 and 19 instead of "risk of bias" (which is more applicable to  
599 systematic reviews of interventions) to include and acknowledge the various sources of evidence that may be used in a  
600 scoping review (e.g., quantitative and/or qualitative research, expert opinion, and policy document).

601 *Extracted from (11)*

| Category        | Query strings | Key Words                                                                                                                                                                                                                                                                                                                                                                                                                                                                                                                                                                                                                                                                                                                                                                                                                          |
|-----------------|---------------|------------------------------------------------------------------------------------------------------------------------------------------------------------------------------------------------------------------------------------------------------------------------------------------------------------------------------------------------------------------------------------------------------------------------------------------------------------------------------------------------------------------------------------------------------------------------------------------------------------------------------------------------------------------------------------------------------------------------------------------------------------------------------------------------------------------------------------|
| Search strategy |               | (telemedicine OR telehealth OR eHealth OR "digital health") * AND ("tropical neglected diseases" OR "neglected diseases" OR "Buruli Ulcer" OR "Chagas Disease" OR Dengue OR "Dengue fever" OR Arbovirosis OR Chikungunya OR Dracunculiasis OR "Guinea-worm Disease" OR Echinococcosis OR "Foodborne trematodiasis" OR "Foodborne trematode Infections" OR "Human African Trypanosomiasis" OR "Sleeping Sickness" OR Leishmaniasis OR kala-azar OR Leprosy OR "Lymphatic Filariasis" OR Elephantitis OR Mycetoma OR Chromoblastomycosis OR "deep mycoses" OR Onchocerciasis OR "River Blindness" OR Filariasis OR Rabies OR Scabies OR ectoparasitoses OR Schistosomiasis OR "Soil-transmitted helminthiasis" OR "Snakebite envenoming" OR Taeniasis OR cysticercosis OR Trachoma OR Yaws OR "Endemic Treponematoses" or "Noma") ** |

\*Searched in "All fields"; \*\* searched in Titles and Abstracts in all databases.



| Author/Reference      | Year | Country of healthcare provider                          | NTD                                                           | Technology/Telemedicine intervention                                                                                                                                    | Study focus                                                                                                                                                                          | Major Findings                                                                                                                            | Total patients and NTD patients who received telemedicine intervention                                               |
|-----------------------|------|---------------------------------------------------------|---------------------------------------------------------------|-------------------------------------------------------------------------------------------------------------------------------------------------------------------------|--------------------------------------------------------------------------------------------------------------------------------------------------------------------------------------|-------------------------------------------------------------------------------------------------------------------------------------------|----------------------------------------------------------------------------------------------------------------------|
| Trindade et al. [14]  | 2008 | Brazil                                                  | Leprosy                                                       | Digital Images shared between doctors by Internet-Based System Developed for teledermatology.                                                                           | Compared the accuracy of the diagnosis sent through images vs. in-person examination in suspected cases of leprosy.                                                                  | Telemedicine sensitivity: 78%; specificity: 31%. diagnostic agreement: 74%.                                                               | N=106 suspect cases of leprosy were reviewed remotely by dermatologists; N=59 confirmed for leprosy                  |
| Galván et al. [18]    | 2014 | Paraguay                                                | Dengue                                                        | Telephone calls - BONIS system of community telesurveillance of febrile symptoms of dengue. Free software                                                               | Feasibility study; evaluated the results of the implementation of the system.                                                                                                        | Increase detection and notification of suspected dengue cases by 157% in 1 year.                                                          | N=157 suspect dengue cases identified remotely by teleconsultations; N=56 confirmed for dengue.                      |
| Konanki et al. [20]   | 2018 | India                                                   | Cysticercosis                                                 | Telephone calls.                                                                                                                                                        | Compared the accuracy of diagnosis by teleconsultation vs. face-to-face to identify critical clinical events in children with neurocysticercosis and seizures after treatment.       | Telemedicine sensitivity: 89%; specificity: 97%; 95% of the events did not require face-to-face consultation.                             | N=228 consultations by phone; N=55 critical clinical complications identified remotely by teleconsultations.         |
| Messagier et al. [15] | 2019 | French Guyana                                           | Leprosy, Leishmaniasis, Scabies, Tungiasis,                   | French Guiana Platform. Computer software for telemedicine in primary health care units and dermatologists in hospitals, with digital camera.                           | Evaluated the quality and usefulness of the telerreferencing system.                                                                                                                 | 92% of total cases managed in peripheral health centers, without the need to travel for face-to-face consultations with dermatologists.   | N=254 cases managed by the telerreferencing system; N=29 NTD cases were reviewed remotely by dermatologists          |
| Naufal et al. [21]    | 2021 | Tanzania. (clinical image classification center in USA) | Trachoma                                                      | Image Capture and Processing System (ICAPS). A smartphone photograph and send image to a virtual reading center. Tropicaldata mHealth app record and transmit the data. | Compared the accuracy of the diagnosis of trachoma eye lesions by teleconsultation vs. face-to-face examination in children.                                                         | Agreement between remote grading of the images compared to the grading by presential provider in field was about 95%.                     | N=1350 patients evaluated for screening; N=54 patients with follicular trachomatous inflammation identified remotely |
| Pedrotti et al. [19]  | 2022 | Brazil                                                  | Dengue                                                        | Videoconferencies - Glob-alMed video-conference software and electronic health records.                                                                                 | Evaluated the effectiveness of teleconsultations in reducing the need for face-to-face medical consultations in patients with mild/moderate acute symptoms during a dengue outbreak. | 5.6% were referred for immediate face-to-face medical evaluation; 94.4% of the cases did not require immediate face-to-face consultation. | N=267 confirmed dengue patients treated remotely by telemedicine                                                     |
| Yotsu et al. [17]     | 2023 | Ivory Coast.                                            | Leprosy, Buruli ulcer Lymphatic filariasis, Scabies, and Yaws | eSkinHealth Mobile app (portable electronic medical record and teledermatology)                                                                                         | Evaluated the app's effectiveness in rural areas for diagnosing and managing skin NTDs and other skin diseases.                                                                      | In the intervention arm, 72.9% (N=151) were diagnosed by the platform, 79 of them NTDs.                                                   | N=151 dermatologic cases were diagnosed on app; N=79 NTD diagnosed and treated remotely by dermatologists;           |
| Castillo et al. [16]  | 2023 | Colombia                                                | Leishmaniasis                                                 | Mobile app - Guaral +ST app (teledermatology)                                                                                                                           | Compared the clinical following of leishmaniasis treatment to by telemedicine to face-to-face care.                                                                                  | Telemedicine increased the proportion of patients monitored at week 26 of treatment by around 53%.                                        | N=49 cutaneous leishmaniasis treatments monitored by app                                                             |

medRxiv preprint doi: <https://doi.org/10.1101/2024.08.07.24311593>; this version posted August 7, 2024. The copyright holder for this preprint (which was not certified by peer review) is the author/funder, who has granted medRxiv a license to display the preprint in perpetuity. It is made available under a [CC-BY 4.0 International license](https://creativecommons.org/licenses/by/4.0/).

|                                                                                                                        | N | References                         |
|------------------------------------------------------------------------------------------------------------------------|---|------------------------------------|
| <b>Telemedicine intervention</b>                                                                                       |   |                                    |
| Consultations between remote person and healthcare provider - realtime /synchronous telemedicine                       | 3 | [18], [19], [20]                   |
| Transmission of medical data (e.g. images, notes) mediated by distant healthcare providers - asynchronous telemedicine | 5 | [14], [15], [16], [17], [21]       |
| <b>Communication technology</b>                                                                                        |   |                                    |
| Telephone                                                                                                              | 2 | [18], [20]                         |
| Videoconference                                                                                                        | 1 | [19]                               |
| Mobile application                                                                                                     | 3 | [16], [17], [21]                   |
| Data/images submission platform                                                                                        | 2 | [14], [15]                         |
| <b>Clinical applicability</b>                                                                                          |   |                                    |
| Telemedicine to ensure patient access to diagnostic                                                                    | 6 | [14], [15], [17], [18], [20], [21] |
| Telemedicine to ensure patient access to treatment                                                                     | 1 | [19]                               |
| Telemedicine to monitor patient treatment                                                                              | 1 | [16]                               |
| <b>Telemedicine providers involved</b>                                                                                 |   |                                    |
| Primary Health Care team                                                                                               | 5 | [14], [15], [16], [17], [18]       |
| Hospital team                                                                                                          | 4 | [14], [15], [19], [20]             |
| Other                                                                                                                  | 1 | [21]                               |
| <b>Location where the study population resides</b>                                                                     |   |                                    |
| Rural or/and remote                                                                                                    | 4 | [15], [16], [17], [21]             |
| Urban                                                                                                                  | 3 | [14], [18], [19]                   |
| Not mentioned                                                                                                          | 1 | [20]                               |
| Latin America                                                                                                          | 5 | [14], [15], [16], [18], [19]       |
| Africa                                                                                                                 | 2 | [17], [21]                         |
| Asia                                                                                                                   | 1 | [20]                               |
| Upper-middle-income economy                                                                                            | 4 | [14], [16], [18], [19]             |
| Lower-middle-income economy                                                                                            | 3 | [17], [20], [21]                   |
| High income country                                                                                                    | 1 | [15]                               |
| <b>Disease studied</b>                                                                                                 |   |                                    |
| Leprosy                                                                                                                | 3 | [14], [15], [17]                   |
| Leishmaniosis                                                                                                          | 2 | [15], [16]                         |
| Dengue                                                                                                                 | 2 | [18], [19]                         |
| Scabies                                                                                                                | 2 | [15], [17]                         |
| Cysticercosis                                                                                                          | 1 | [20]                               |
| Trachoma                                                                                                               | 1 | [21]                               |
| Tungiasis                                                                                                              | 1 | [15]                               |
| Buruli ulcer, Lymphatic filariasis, Yaws                                                                               | 1 | [17]                               |

Figure 2 – PRISMA-ScR chart

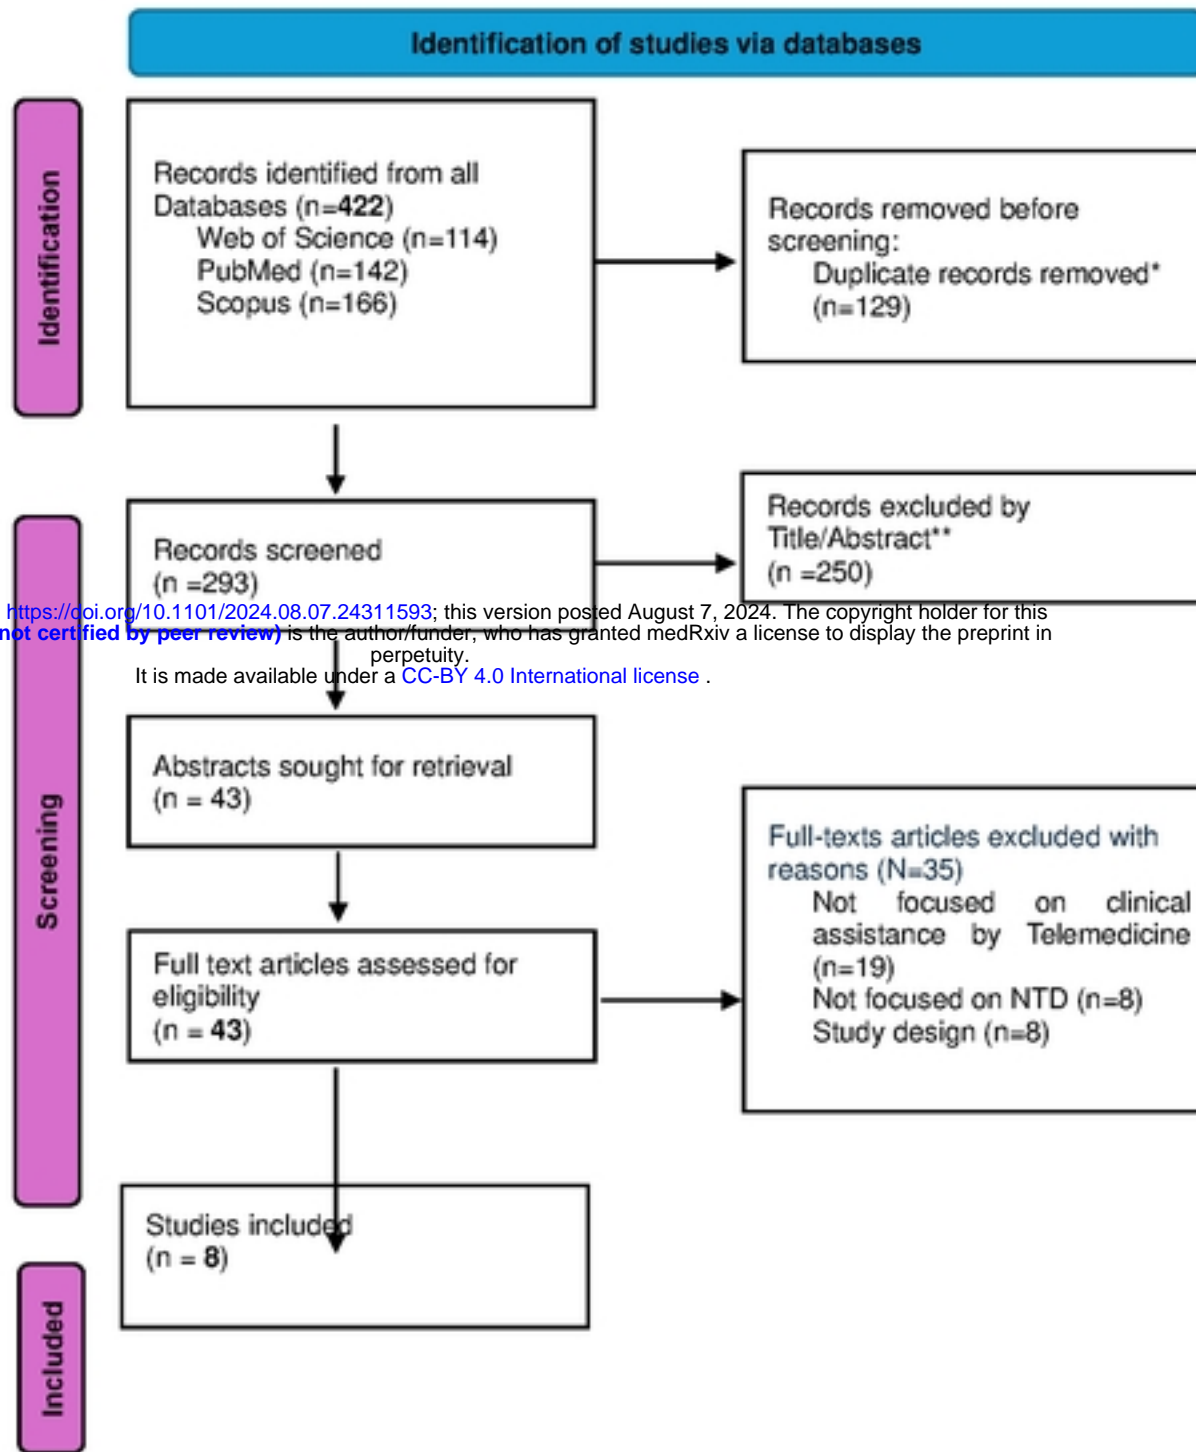

medRxiv preprint doi: <https://doi.org/10.1101/2024.08.07.24311593>; this version posted August 7, 2024. The copyright holder for this preprint (which was not certified by peer review) is the author/funder, who has granted medRxiv a license to display the preprint in perpetuity. It is made available under a [CC-BY 4.0 International license](https://creativecommons.org/licenses/by/4.0/).

\* Duplicates identified and excluded by automation tool Rayyan (13); \*\* abstracts selected by researchers individually in blinded sections and combined using the automation tool Rayyan (13).
